# Supplementary material for: Effective use of slag as a product of the CFBC technology to purify water environment of copper ions
Source: Research Square preprint supplement (doi:10.21203/rs.3.rs-1733986/v1), 2022-06-15
Supplement: Supplementary file 1 [file 31c9a5fdbcb80a7f64f6723f.docx]

**Fig. SM14** Langmuir model adsorption isotherms (CFBC-S dosage 2 - 5 g/L)
