# Supplementary material for: Effective use of slag as a product of the CFBC technology to purify water environment of copper ions
Source: Research Square preprint supplement (doi:10.21203/rs.3.rs-1733986/v1), 2022-06-15
Supplement: Supplementary file 2 [file 84c89df25f365ef3a6ce0818.docx]

**Fig. SM9** The impact of adsorbent dosage on adsorption capacity of Cu(II)
